# Supplementary material for: Evaluation of physicochemical properties and bacterial photoinactivation of phenothiazine photosensitizers
Source: Royal Society of Chemistry journal article supplement (doi:10.1039/c8pp00584b), 2019-04-22
Supplement: c8pp00584b1.pdf [file c8pp00584b1.pdf]

## SUPPORTING INFORMATION

### Evaluation of Physicochemical Properties and Bacterial Photoinactivation of Phenothiazine Photosensitizers

Jimena Vara<sup>1a</sup>, María S. Gualdesi<sup>1</sup>, Virginia Aiassa<sup>1a</sup> and Cristina S. Ortiz<sup>1\*</sup>.

**Figure S1:** Chromatograms obtained for the initial and final samples of the chemical stability study of AzB and AzBBr at different pH values.

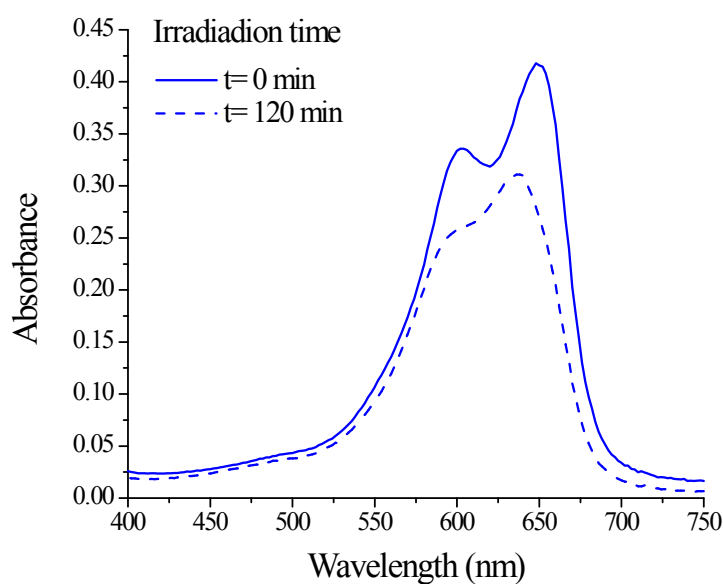

**Figure S2:** Spectrum of absorption of AzBBr at different times of irradiation used in the photostability study.

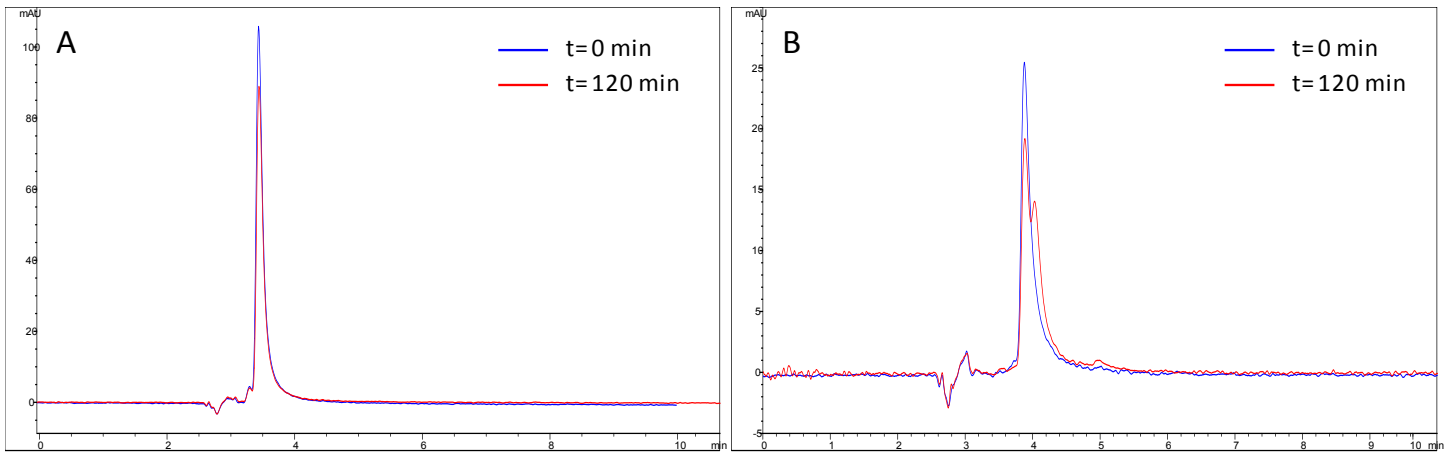

**Figure S3:** Chromatograms obtained during the photostability study of AzB (A) and AzBBr (B).

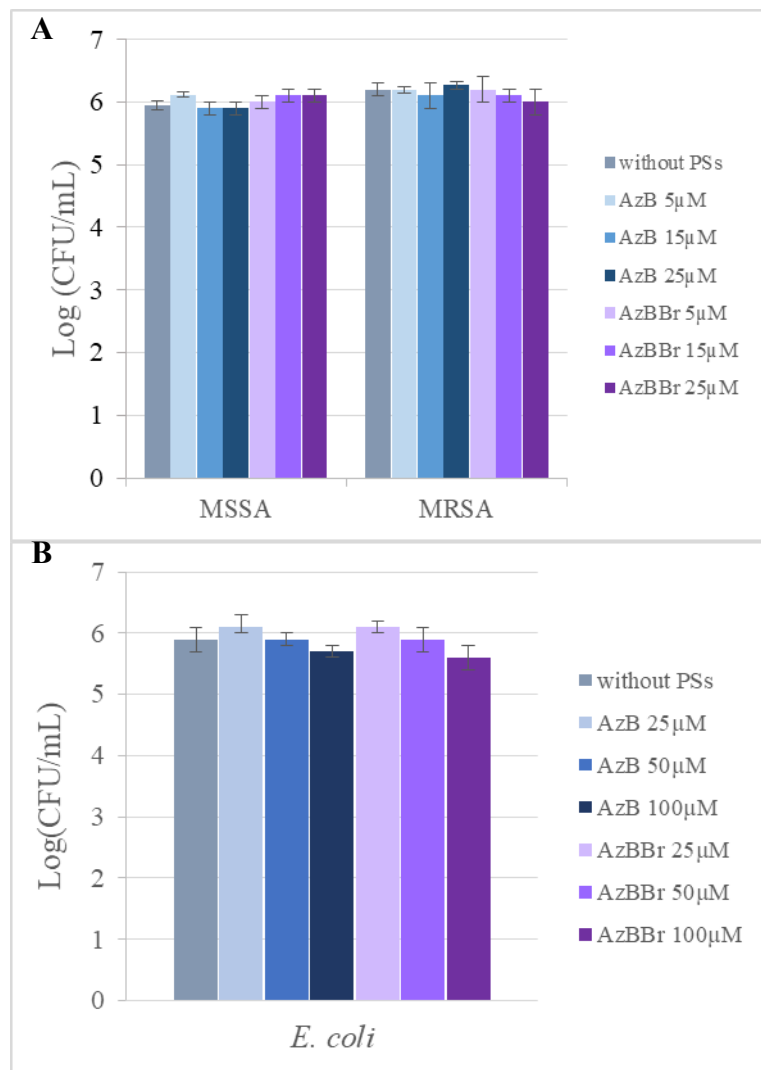

**Figure S4:** Evaluation of the toxicity (in the dark) of the PSs using the same concentrations and doses of light as in the photodynamic inactivation studies of the different microorganisms.
